# Supplementary material
Source: PubMed Central journal article supplement (PMC5881627)
Supplement: EMBJ-37-e98311-s001.pdf [file EMBJ-37-e98311-s001.pdf]

## Appendix Table of Contents

|                                         | Page |
|-----------------------------------------|------|
| Appendix Figure S1                      | 2    |
| Appendix Figure S2                      | 3    |
| Appendix Figure S3                      | 4    |
| Appendix Figure S4                      | 5    |
| Appendix Table S1: Patient Demographics | 6    |
| Appendix Table S2: Antibodies           | 7    |
| Appendix Table S3: Primers              | 8    |
| Appendix Figure Legends                 | 9,10 |

# Willet et al. Appendix Fig S1

## A Control vs. Tam: Parietal Cells

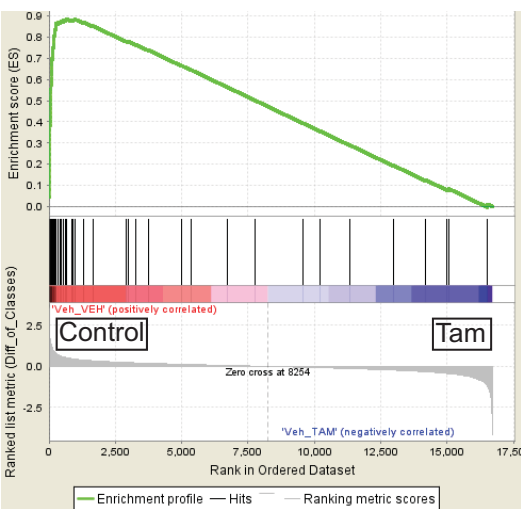

## B Rap Control vs. Rap+Tam: Parietal Cells

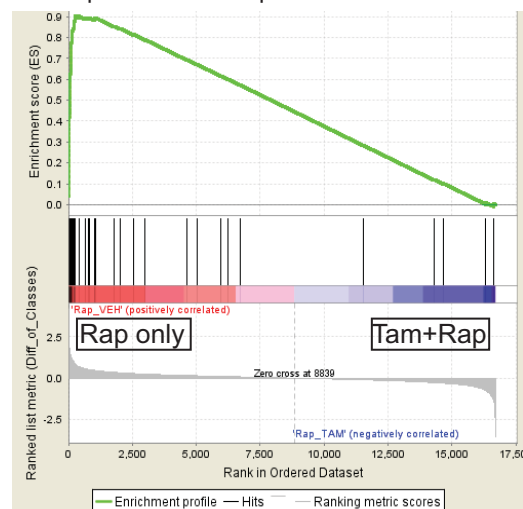

## C Rap+Tam vs. Tam: Parietal Cells

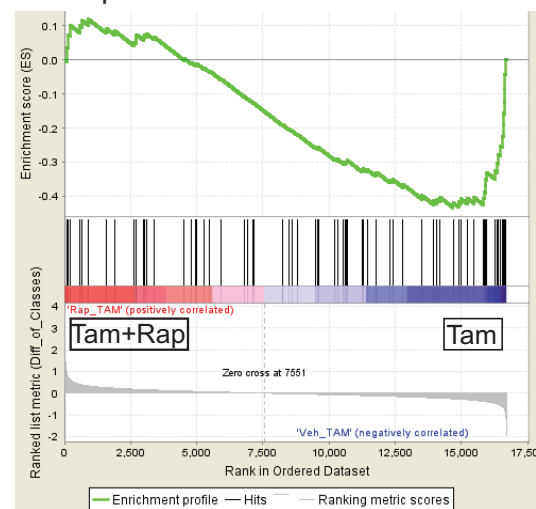

## D Rap+Tam vs. Tam: Chief Cells

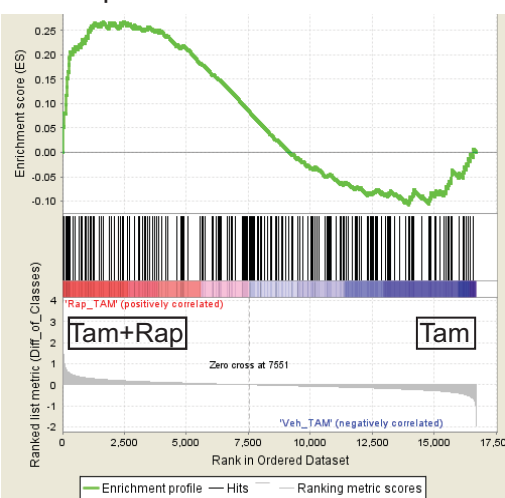

## E Rap+Tam vs. Tam: known SPEM genes

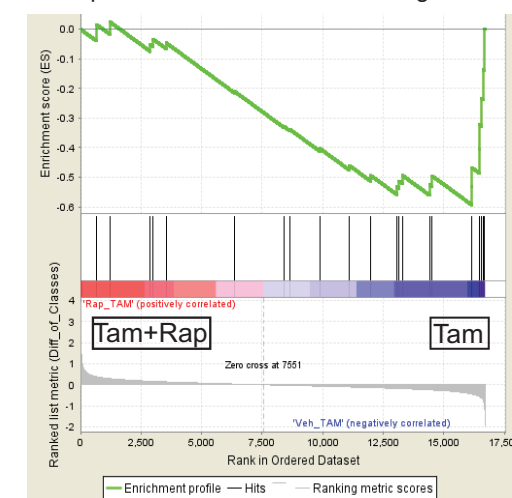

Lamp1 DAPI

**Vehicle**

**8hr Cer**

**1D Cer**

**3D Cer**

**5D Cer**

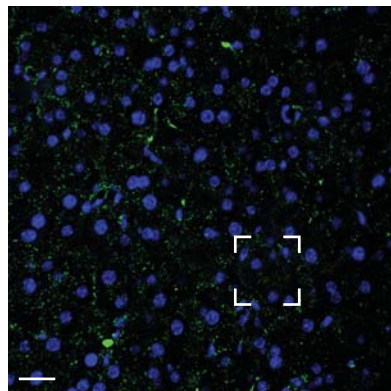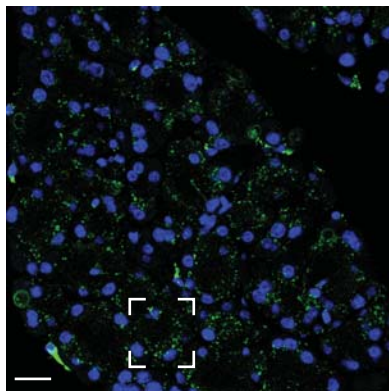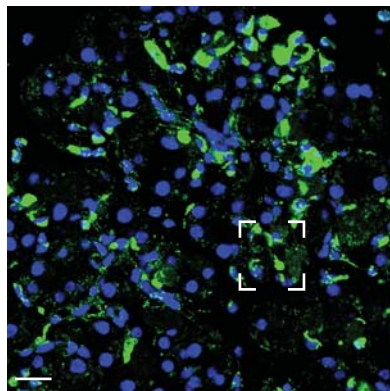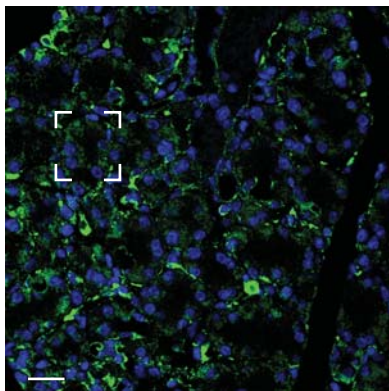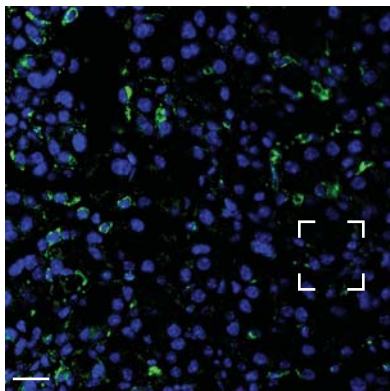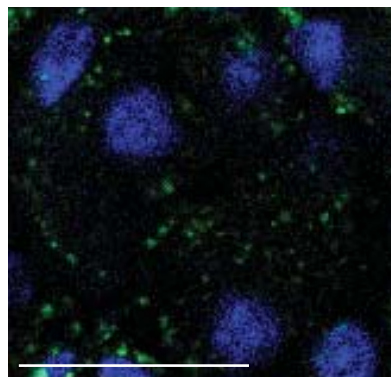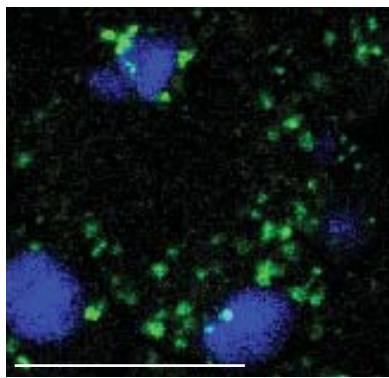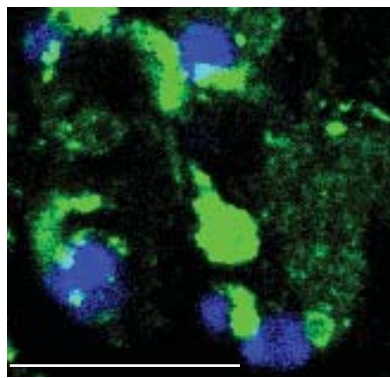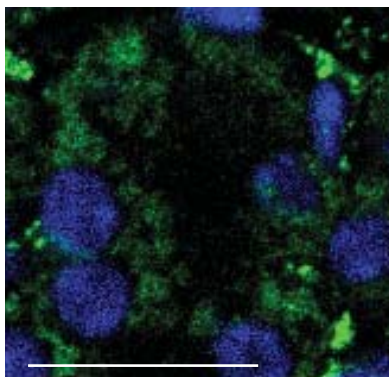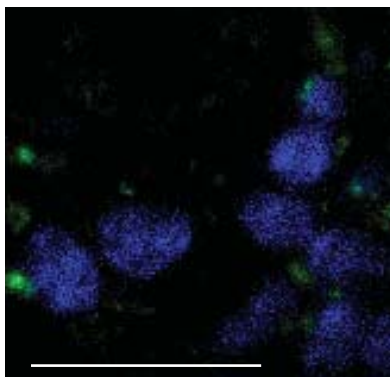

2 Week Cerulein

*Gnptab*<sup>+/-</sup>*Gnptab*<sup>-/-</sup>**A**

Amylase DAPI

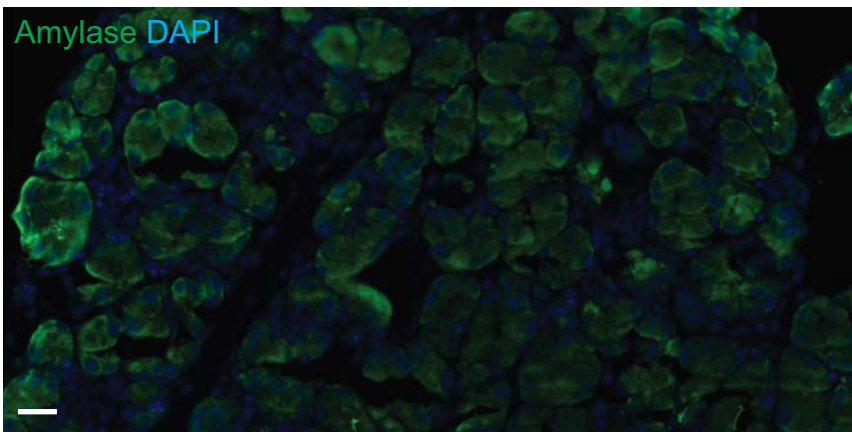

Amylase DAPI

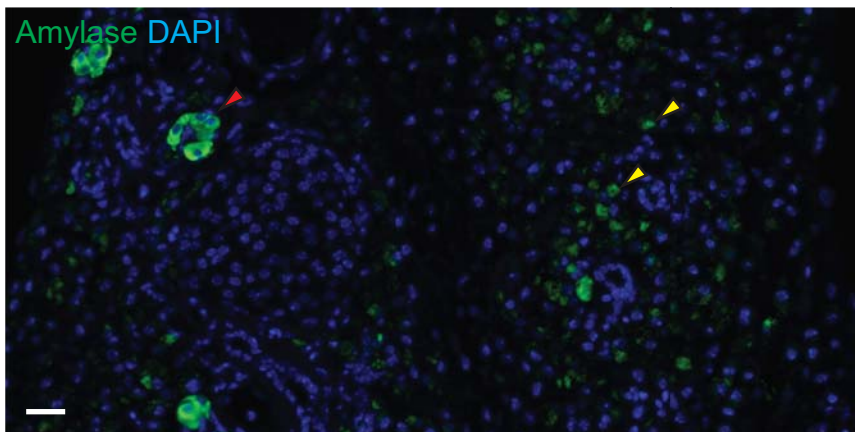**B**

CK8/18

Gata4

Ecad

CK8/18

Gata4

Ecad

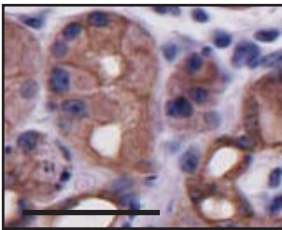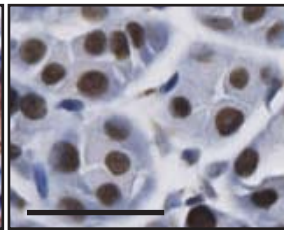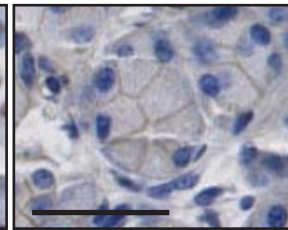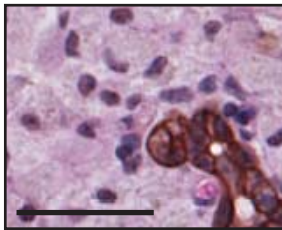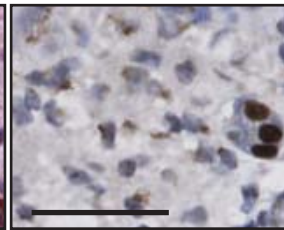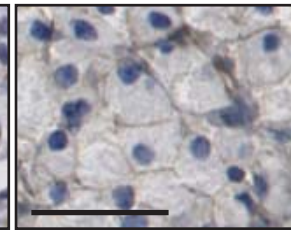

Cleaved Caspase 3

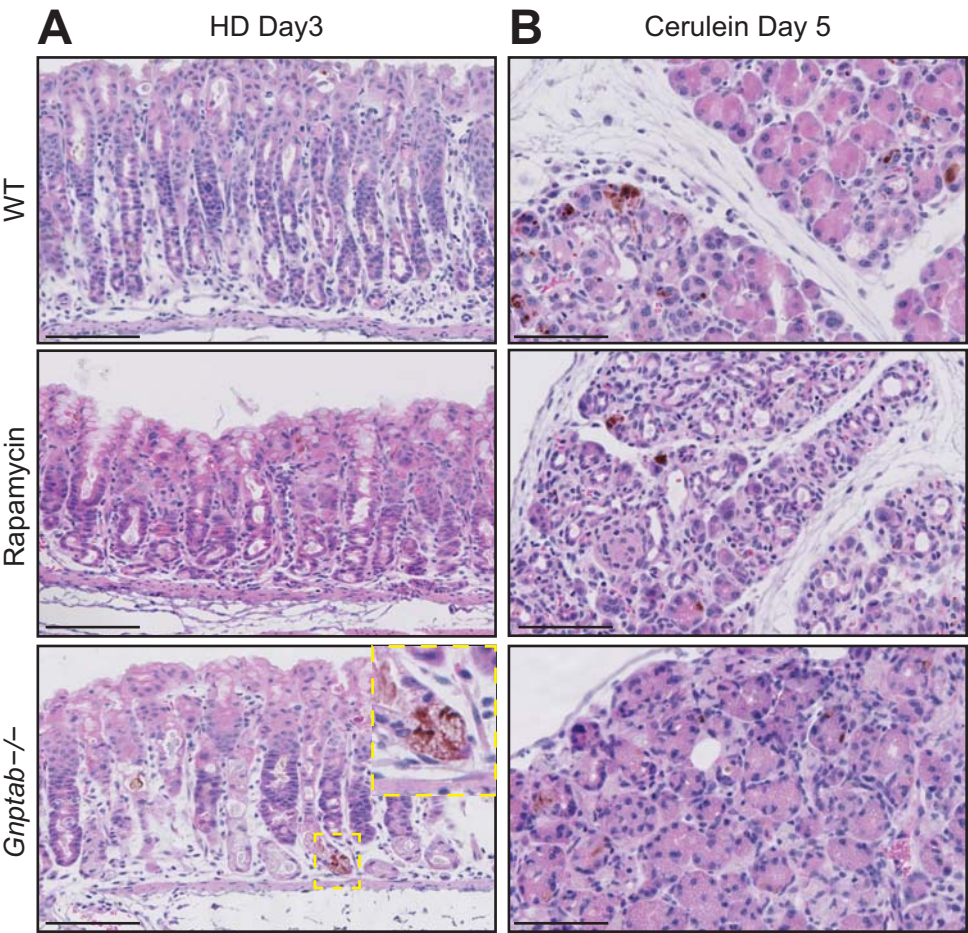

# Appendix Table S1: Patient Demographics

|                            |       |
|----------------------------|-------|
| <b>Total Sample Number</b> | 772   |
| Normal Mucosa              | 100   |
| SPEM                       | 162   |
| IM                         | 163   |
| Dysplasia                  | 23    |
| Cancer                     | 324   |
| Age Range                  | 25-84 |
| Average Age                | 64    |
| <b>Gender</b>              |       |
| Male                       | 448   |
| Female                     | 324   |

# Appendix Table S2: Antibodies

| Antibody Table  |                           |             |          |
|-----------------|---------------------------|-------------|----------|
| Antibodies      | Company                   | Application | Dilution |
| BrdU            | DHSB (G3G4)               | IF,IHC      | 1:500    |
| GIF             | Gift, David Alpers, WashU | IF          | 1:250    |
| Ezrin           | Santa Cruz (sc-58758)     | IF          | 1:1000   |
| pS6 240/244     | Cell Signaling (D68F8)    | IF,IHC,WB   | 1:500    |
| pS6 235/236     | Cell Signaling (57.2.2E)  | IF,WB       | 1:100    |
| Pgc             | Abcam (ab 31464)          | IF          | 1:500    |
| Cpa1            | R&D Systems (AF2765)      | IF          | 1:250    |
| Amylase         | Sigma-Aldrich (A8273)     | IF          | 1:250    |
| Sox9            | Millipore (ABE571)        | IHC         | 1:1000   |
| GSII            | Molecular Probes (L32451) | IF          | 1:250    |
| Lamp1           | DHSB (1D4B)               | IF          | 1:500    |
| Cathepsin D     | Santa Cruz (sc- 6486)     | IF          | 1:1000   |
| $\beta$ tubulin | Abcam (ab21057)           | WB          | 1:1000   |
| Ki67            | Abcam (ab15580)           | IHC         | 1:500    |
| CK8/18          | Abcam (ab194130)          | IHC         | 1:1000   |
| Gata4           | Santa Cruz (sc-9053)      | IHC         | 1:500    |
| E-Cadherin      | BD Biosciences (610182)   | IHC         | 1:250    |

# Appendix Table S3: qRT-PCR Primers

| Primers Name | Sequence 5' to 3'      |
|--------------|------------------------|
| Atp4b F      | CAGGAGAAGAAGTCATGCAGC  |
| Atp4b R      | GAAACCTGCGTAGTACAGGCT  |
| Clu F        | CCAGCCTTTCTTTGAGATGA   |
| Clu R        | CTCCTGGCACTTTTCACACT   |
| Aurka F      | TCTAGAATATGCGCCCCTTG   |
| Aurka R      | CCGTTTGAGCCAAGCAGTA    |
| Aurkb F      | GAAGAAGAGCCGTTTCATCG   |
| Aurkb R      | TCCGACTCTTCTGCAGTTCC   |
| Ccna2 F      | CTTGTAGGCACGGCTGCTAT   |
| Ccna2 R      | AGCCAAGTCAAAGCAAGGA    |
| Ccnb2 F      | CAAATCCGAGAAATGGAGA    |
| Ccnb2 R      | GCCACCTGAGAAGGATGGTA   |
| Cdk1 F       | CTGGGCAGTTCATGGATTCT   |
| Cdk1 R       | TCGGTATTCCAAACGCTCTG   |
| Ccnd1 F      | TTGACTGCCGAGAAGTTGTG   |
| Ccnd1 R      | CTGGCATTTTGGAGAGGAAG   |
| TBP F        | CAAACCCAGAATTGTTCTCCTT |
| TBP R        | ATGTGGTCTTCCTGAATCCCT  |



**Appendix Figure S1 - GSEA of microarray data shows that Rapamycin does not affect injury-induced changes in parietal and chief cell gene expression but causes aberrant expression of a cohort of genes typically induced in SPEM.**

**A, B** GSEA and Genechip analyses were performed as for Fig.4, except panels **A** and **B** depict comparisons of a parietal cell specific gene set performed by flow cytometric purification of parietal cells (see Methods) with panel A showing how parietal cell gene expression is greatly enriched in vehicle control vs. HD-Tam and panel B showing that adding rapamycin with or without HD-Tam does not affect this pattern.

**C** Direct comparison of rapamycin+HD-Tam vs. HD-Tam shows that loss of parietal cell gene expression after HD-Tam treatment is not affected by rapamycin; if anything, rapamycin causes even more parietal cell injury as there is some enrichment of parietal cell gene expression in HD-Tam alone.

**D** Previously published chief cell-specific gene set also shows no relative enrichment in HD-Tam vs. HD-Tam+rapamycin, indicating chief cell palignosis is not affected by rapamycin.

**E** On the other hand, a previously published SPEM gene set shows enrichment in a specific sub-cluster of genes in HD-Tam vs. HD-Tam+rapamycin, indicating rapamycin blocks induction of a certain subset of SPEM genes. IM, intestinal metaplasia; pSPEM, proliferative SPEM; qSPEM, quiescent SPEM.

**Appendix Figure S2 - LAMP1 time course during cerulein injury shows a pattern of increased then decreased activation similar to that of stomach.**

Upon injury LAMP1 vesicles are induced in acinar cells starting around 8 hours and peak around 24 hours. By 3 to 5 days, the vesicles in exocrine cells begin to decrease back towards levels seen at homeostasis. Boxes in top panels are magnified to highlight acinar cells in bottom panels. Scale bars: 20  $\mu\text{m}$

**Appendix Figure S3 - *Gnptab*<sup>-/-</sup> acinar cells after 2 week cerulein treatment remain cryptically acinar.**

**A** Comparison of amylase staining between *Gnptab*<sup>-/-</sup> and *Gnptab*<sup>-/+</sup> following 2 weeks of cerulein treatment. In *Gnptab*<sup>-/-</sup> tissue, only scattered acinar cells remain highly positive for amylase (red arrowhead), with the vast majority only retaining weak positivity (yellow arrowheads). Scale bar: IF, 20 µm; IHC, 50 µm.

**B** Survey of metaplasia (CK8/18), mature acinar (GATA4), and epithelial markers (E-cadherin) on *Gnptab*<sup>-/-</sup> tissue. *Gnptab*<sup>-/-</sup> acinar tissue does not stain for the metaplasia marker CK8/18 or the mature acinar nuclear marker Gata4. The poorly differentiated acinar cells are positive for E-cadherin. Scale bar: IF, 20 µm; IHC, 50 µm.

**Appendix Figure S4 - Apoptotic cells death during HD tamoxifen or cerulein-induced injury.**

**A** At HD tamoxifen day 3 with or with rapamycin treatment, the stomach epithelium lacks apoptotic cells, indicating the main atrophy stage – in which parietal cells, but not chief cells, die by apoptosis – occurred earlier. In *Gnptab*<sup>-/-</sup> tissue, apoptotic cells can be found located at the base of some units consistent with the increased dropout of basal cells described in the results. Scale bar, 100 µm.

**B** During Cerulein at day 5, scattered apoptotic cells are seen in all experimental conditions, indicating the atrophy in this more asynchronous injury model is still occurring during this time window. No qualitative increase in cleave caspase positive cells were seen in rapamycin or *Gnptab*<sup>-/-</sup> tissue. Scale bar, 100 µm.
